# Supplementary material
Source: publisher figshare collection journal article supplement (https://tandf.figshare.com/ndownloader/files/18725693)
Supplement: Supplementary file 1 [file 18725693]

Table 1. *t-test Results Comparing Full Cocaine Dependent Sample to Horowitz's Normative Sample*

|  | | | | | |
| --- | --- | --- | --- | --- | --- |
|  |  | CD Sample | Horowitz's Norms | CD vs. Norms | Effect Size |
|  | (n= 403) | (n = 800) |  |  |
|  |  | *M (SD)* | *M (SD)* | *t(1201)* | Cohen’s *d* |
| Baseline | *Total IIP score* | 67.79 (37.23) | 51.5 (34.3) | 7.55*** | 0.46 |
| Month 1 |  | 60.38 (40.76) | 51.5 (34.3) | 3.97*** | 0.24 |
| Month 6 |  | 48.64 (41.92) | 51.5 (34.3) | 1.26 | 0.08 |
|  | *Octants* |  |  |  |  |
| Baseline | Domineering | 6.65 (5.52) | 4.9 (4.5) | 5.89*** | 0.34 |
| Month 1 |  | 6.09 (5.56) | 4.9 (4.5) | 3.8** | 0.23 |
| Month 6 |  | 4.95 (5.34) | 4.9 (4.5) | 0.16 | 0.01 |
| Baseline | Vindictive | 7.49 (5.62) | 5.3 (5.1) | 6.79*** | 0.42 |
| Month 1 |  | 6.78 (5.65) | 5.3 (5.1) | 4.58*** | 0.28 |
| Month 6 |  | 5.76 (5.68) | 5.3 (5.1) | 1.42 | 0.09 |
| Baseline | Cold | 8.69 (6.59) | 5.7 (5.9) | 7.97*** | 0.49 |
| Month 1 |  | 7.75 (6.82) | 5.7 (5.9) | 5.4*** | 0.33 |
| Month 6 |  | 6.33 (6.59) | 5.7 (5.9) | 1.68 | 0.1 |
| Baseline | Socially Avoidant | 8.59 (6.19) | 6.5 (5.7) | 5.83*** | 0.36 |
| Month 1 |  | 7.82 (6.75) | 6.5 (5.7) | 3.56** | 0.22 |
| Month 6 |  | 6.22 (6.27) | 6.5 (5.7) | 0.78 | 0.05 |
| Baseline | Nonassertive | 9.28 (7.02) | 7.4 (6.1) | 4.79*** | 0.29 |
| Month 1 |  | 8.56 (7.48) | 7.4 (6.1) | 2.88* | 0.18 |
| Month 6 |  | 6.78 (6.93) | 7.4 (6.1) | 1.59 | 0.1 |
| Baseline | Exploitable | 9.32 (5.91) | 7.8 (5.3) | 4.51*** | 0.28 |
| Month 1 |  | 7.96 (6.21) | 7.8 (5.3) | 0.47 | 0.03 |
| Month 6 |  | 6.28 (5.95) | 7.8 (5.3) | 3.32** | 0.2 |
| Baseline | Overly nurturant | 10.12 (5.90) | 8.2 (5.5) | 5.58*** | 0.34 |
| Month 1 |  | 8.74 (6.17) | 8.2 (5.5) | 1.54 | 0.09 |
| Month 6 |  | 6.83 (6.27) | 8.2 (5.5) | 3.89*** | 0.24 |
| Baseline | Intrusive | 7.63 (5.15) | 5.7 (4.8) | 6.42*** | 0.39 |
| Month 1 |  | 6.70 (5.18) | 5.7 (4.8) | 3.32** | 0.2 |
| Month 6 |  | 5.56 (5.35) | 5.7 (4.8) | 0.46 | 0.03 |

*Note.* ****p* < 0.0001. ***p* < 0.001. **p* < 0.05. Horowitz et al., 2000).

*Note.* IIP = Inventory of Interpersonal Problems; CD = Cocaine dependent.

Descriptive statistics for the IIP unstandardized scores for the whole CD sample at baseline, Month 1, Month 6 and Horowitz’s normative sample with t-scores, p values and effect sizes from unpaired t-tests of differences between whole CD sample at each time point to the normative population

*Figure 1. n=402.*  Placement of the entire CD sample at each time point. Month 6 = treatment termination.
